# Supplementary material
Source: PubMed Central journal article supplement (PMC3544971)
Supplement: NIHMS430737-supplement-1_si_001.pdf [file NIHMS430737-supplement-1_si_001.pdf]

## **Supporting Information**

*of*

### **Optimization of Brush-like Cationic Copolymers for Non-viral Gene Delivery**

Hua Wei, Joshuel A. Pahang, Suzie H. Pun\*

**1. Table S1 & S2**

**2. Figure S1-S5**

**Table S1.** Summary of P(GMA)<sub>50</sub>-*b*-P(HPMA) prepared at different polymerization time using P(GMA)<sub>50</sub> as a macro-CTA.

| Condition                           | No. | Time (min) | Conv. (%) | Real structure determined by NMR                       |
|-------------------------------------|-----|------------|-----------|--------------------------------------------------------|
|                                     | 1   | 40         | 5.8       | P(GMA) <sub>50</sub> - <i>b</i> -P(HPMA) <sub>18</sub> |
| [M]:[Macro-CTA]:[I]<br>= 300:1:0.33 | 2   | 90         | 9.9       | P(GMA) <sub>50</sub> - <i>b</i> -P(HPMA) <sub>33</sub> |
| [M] = 1.0 M,<br>T = 70 °C           | 3   | 280        | 16.8      | P(GMA) <sub>50</sub> - <i>b</i> -P(HPMA) <sub>49</sub> |
|                                     | 4   | 480        | 27.2      | P(GMA) <sub>50</sub> - <i>b</i> -P(HPMA) <sub>83</sub> |

**Table S2.** Summary of P(GMA)<sub>50</sub>-*b*-P(OEGMA) prepared at different polymerization time using P(GMA)<sub>50</sub> as a macro-CTA.

| Condition                            | No. | Time (min) | Conv. (%) | Real structure determined by NMR                           |
|--------------------------------------|-----|------------|-----------|------------------------------------------------------------|
|                                      | 1   | 10         | 3.0       | P(GMA) <sub>50</sub> - <i>b</i> -P(OEGMA300) <sub>6</sub>  |
| [M]:[Macro-CTA]:[I]<br>= 200:1:0.33, | 2   | 20         | 5.5       | P(GMA) <sub>50</sub> - <i>b</i> -P(OEGMA300) <sub>11</sub> |
| [M] = 1.0 M,<br>T = 70 °C            | 3   | 30         | 7.5       | P(GMA) <sub>50</sub> - <i>b</i> -P(OEGMA300) <sub>15</sub> |
|                                      | 4   | 40         | 11.5      | P(GMA) <sub>50</sub> - <i>b</i> -P(OEGMA300) <sub>23</sub> |

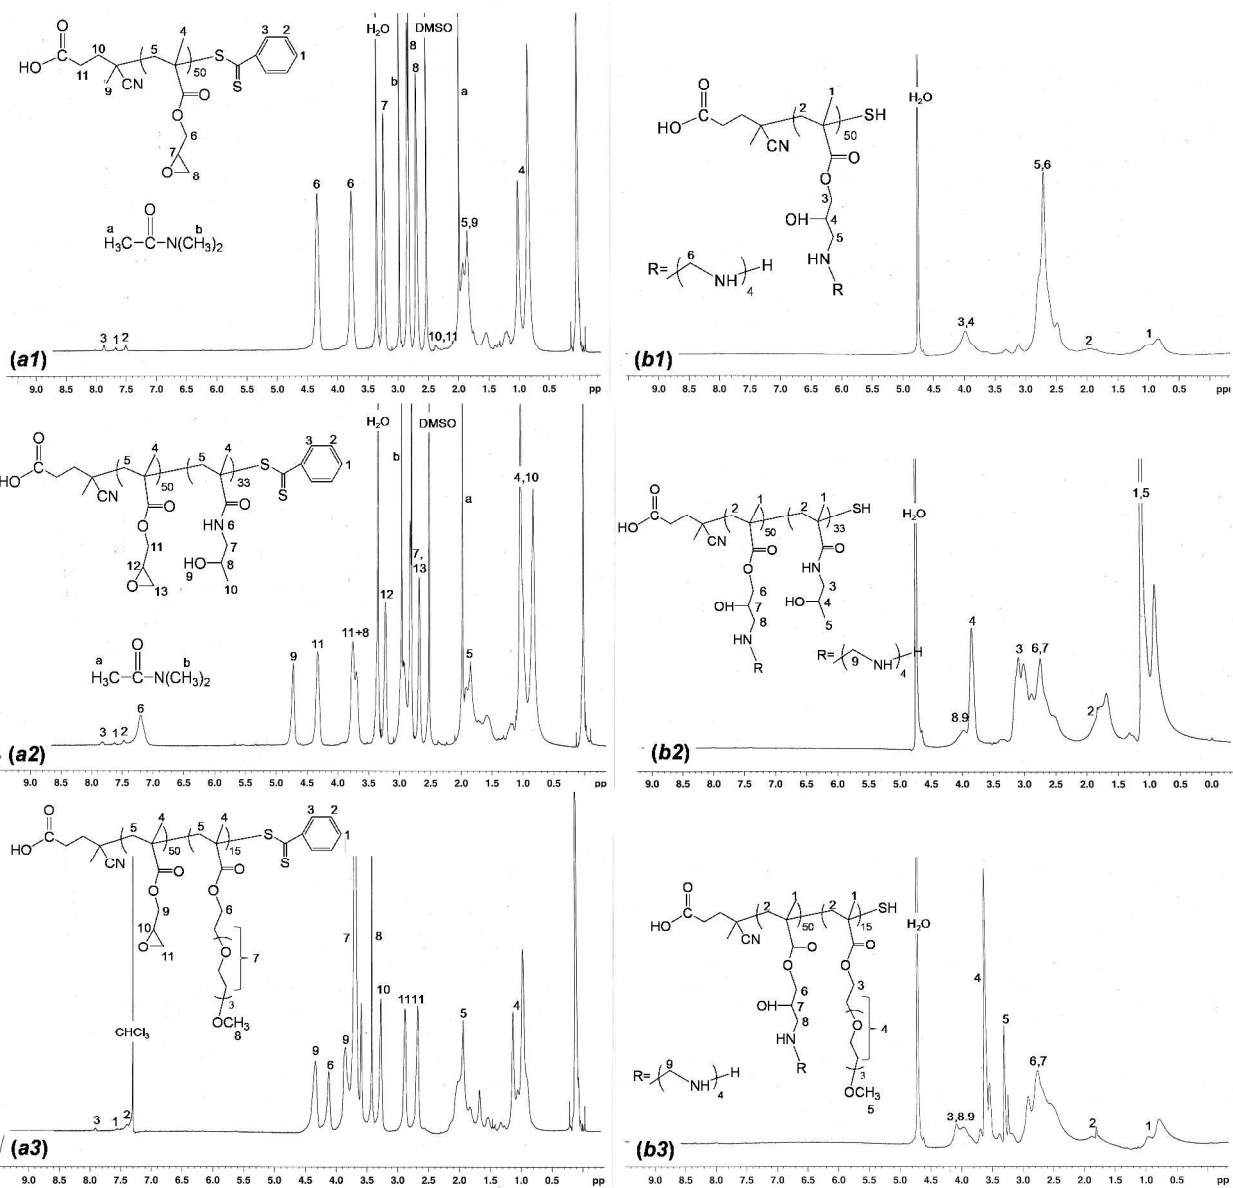

**Figure S1.**  $^1\text{H}$  NMR spectra of (a1) P(GMA)<sub>50</sub> in DMSO; (a2) P(HPMA)<sub>33</sub>-b-P(GMA)<sub>50</sub> in DMSO; (a3) P(OEGMA)<sub>15</sub>-b-P(GMA)<sub>50</sub> in CDCl<sub>3</sub>; (b1) P(GMA-TEPA)<sub>50</sub> in D<sub>2</sub>O; (b2) P(HPMA)<sub>33</sub>-b-P(GMA-TEPA)<sub>50</sub> in D<sub>2</sub>O; (b3) P(OEGMA)<sub>15</sub>-b-P(GMA-TEPA)<sub>50</sub> in D<sub>2</sub>O.

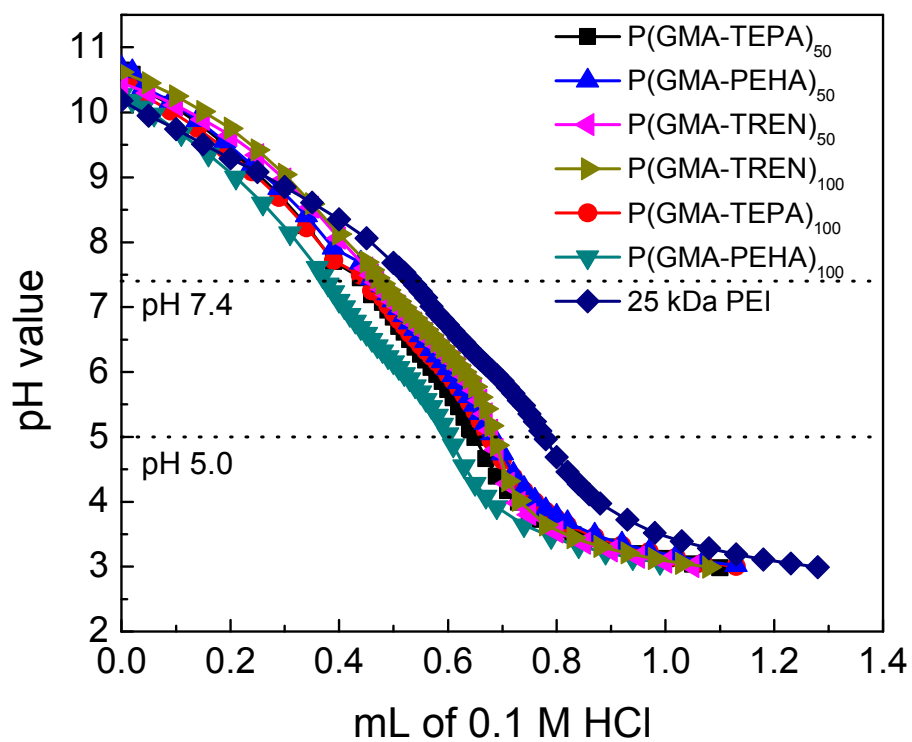

**Figure S2.** Buffering capacity of various P(GMA-oligoamine)<sub>50/100</sub> obtained by titrating polymer aqueous solution (0.2 mg/mL) in 0.15 M aqueous NaCl (pH 10, adjusted with NaOH) with 0.1 M HCl. As a reference, the titration curve of 25 kDa bPEI is also presented.

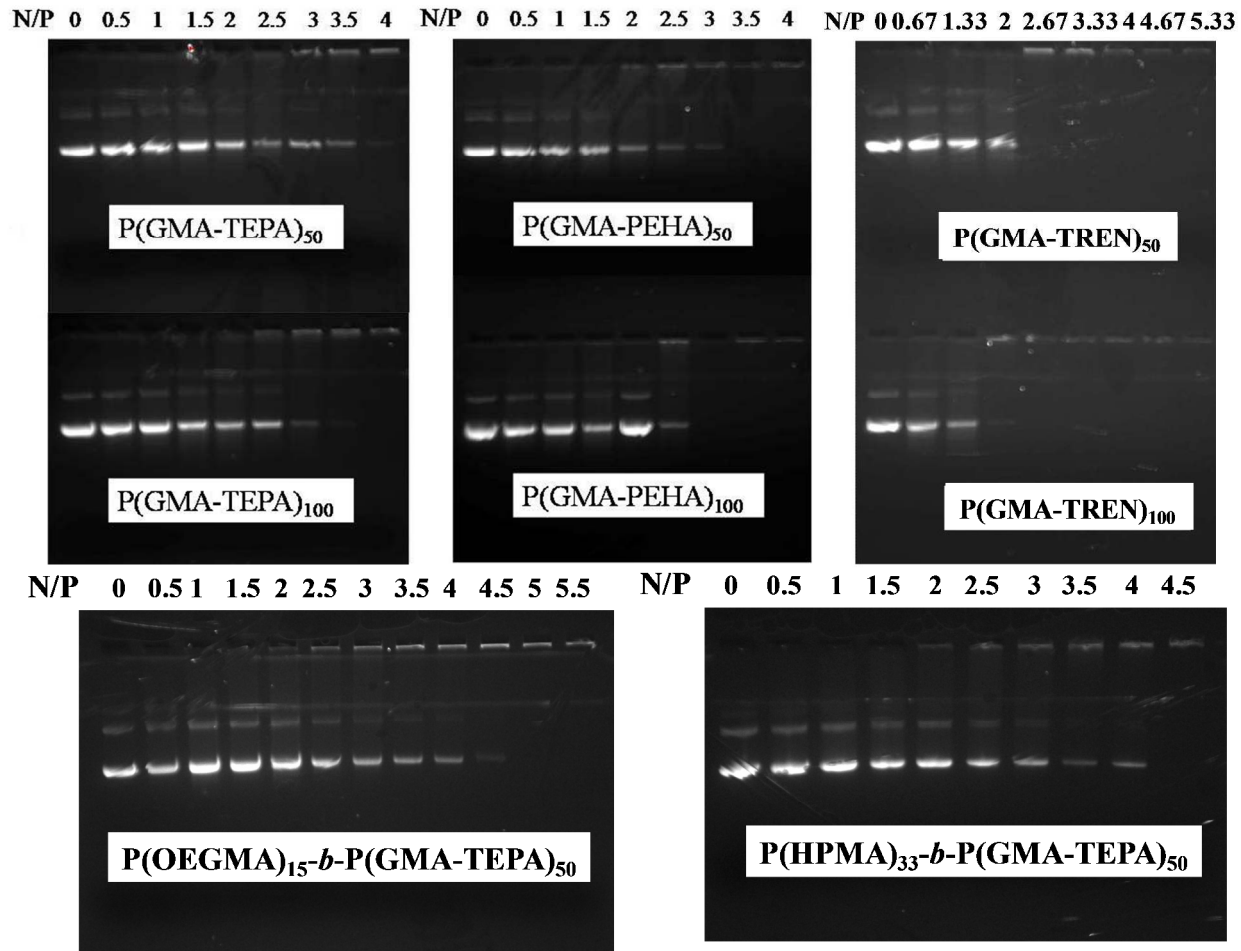

**Figure S3.** Agarose gel electrophoresis of various P(GMA-oligoamine) polyplexes formed by complexation with plasmid DNA at N/P ratios ranging from 0/1 to 5.5/1.

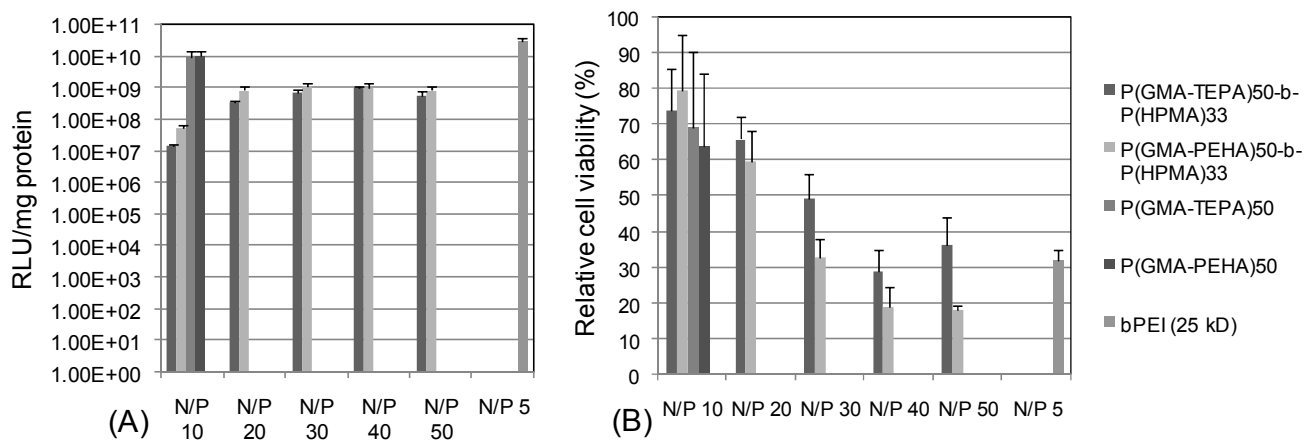

**Figure S4.** Transfection efficiency (A) and relative cell viability (B) of polyplexes formed by P(HPMA)<sub>33</sub>-*b*-P(GMA-TEPA/PEHA)<sub>50</sub>. Data are shown as mean ± SD (n = 3).

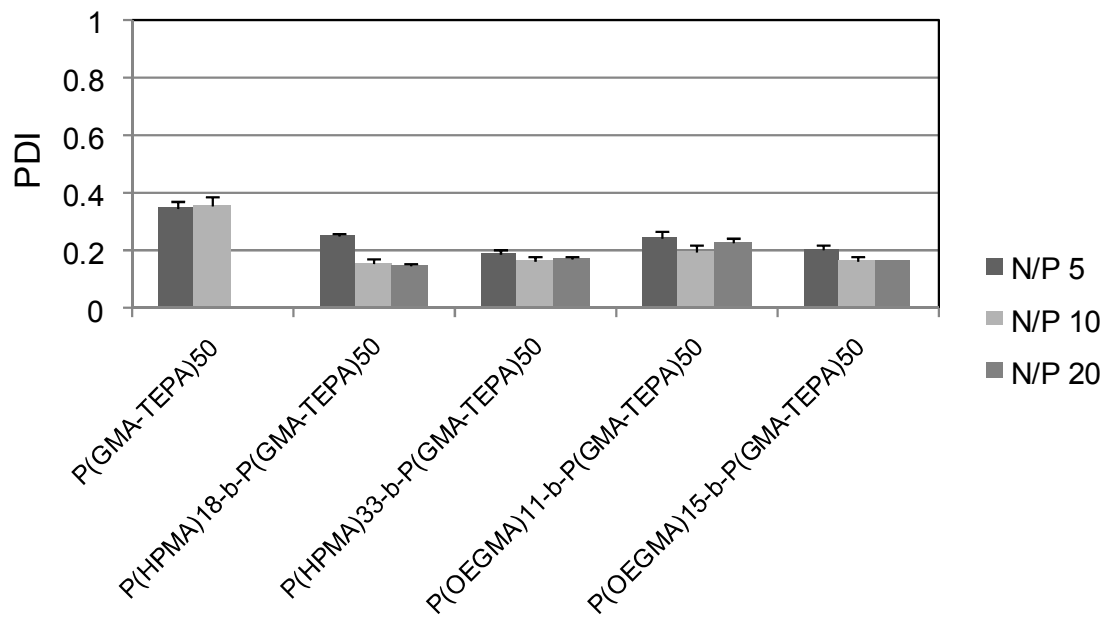

**Figure S5.** Average size distributions (PDIs) of various polyplexes formed at different N/P ratios in 150 mM PBS.
